# Supplementary material for: Hyperbranched polyethers with tunable glass transition temperature: controlled synthesis and mixing rules
Source: Royal Society of Chemistry journal article supplement (doi:10.1039/c4ra04077e), 2014-01-01
Supplement: c4ra04077e1.pdf [file c4ra04077e1.pdf]

## SUPPORTING INFORMATION

# Hyperbranched polyethers with tunable glass transition temperature: controlled synthesis and mixing rules

Tuan Liu<sup>a,b</sup>, Xinxin Geng<sup>a,b</sup>, Yongxing Nie<sup>a,b</sup>, Ruoshi Chen<sup>a</sup>, Yan Meng<sup>\*,a</sup> and Xiaoyu Li<sup>\*,b</sup>

a. Key Laboratory of Carbon Fiber and Functional Polymers, Ministry of Education, Beijing University of Chemical Technology, Beijing 100029, P. R. China

b. State Key Laboratory of Organic-Inorganic Composites, Beijing University of Chemical Technology, Beijing 100029, P. R. China

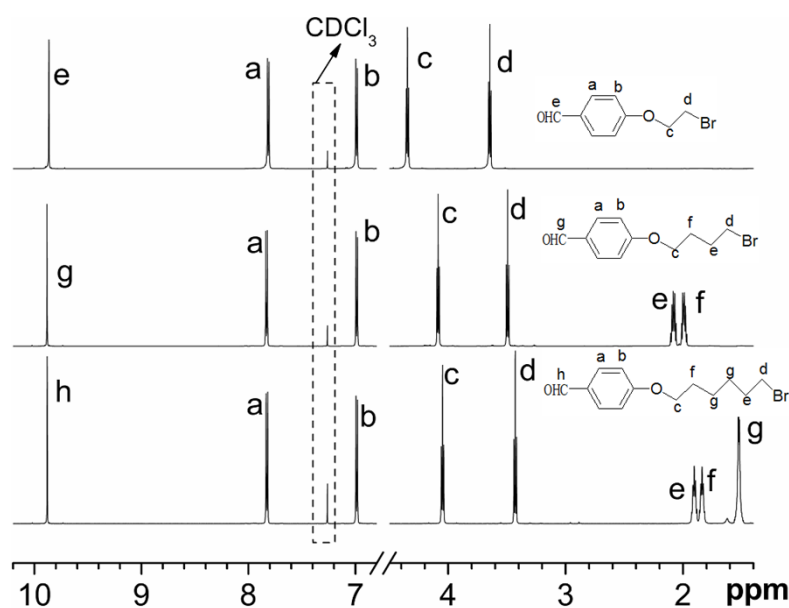

**Fig. S1**  $^1\text{H}$  NMR spectra of monomers with different spacer lengths, *i.e.*,  $n=2, 4,$  and  $6$ .

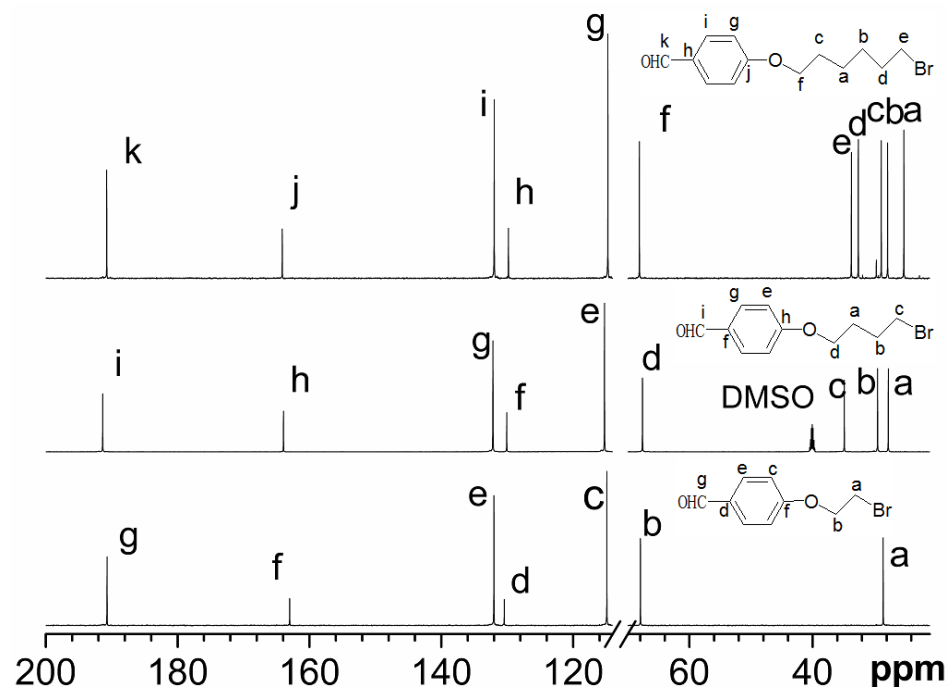

**Fig. S2**  $^{13}\text{C}$  NMR spectra of monomers with different spacer lengths, *i.e.*,  $n=2, 4,$  and  $6$ .

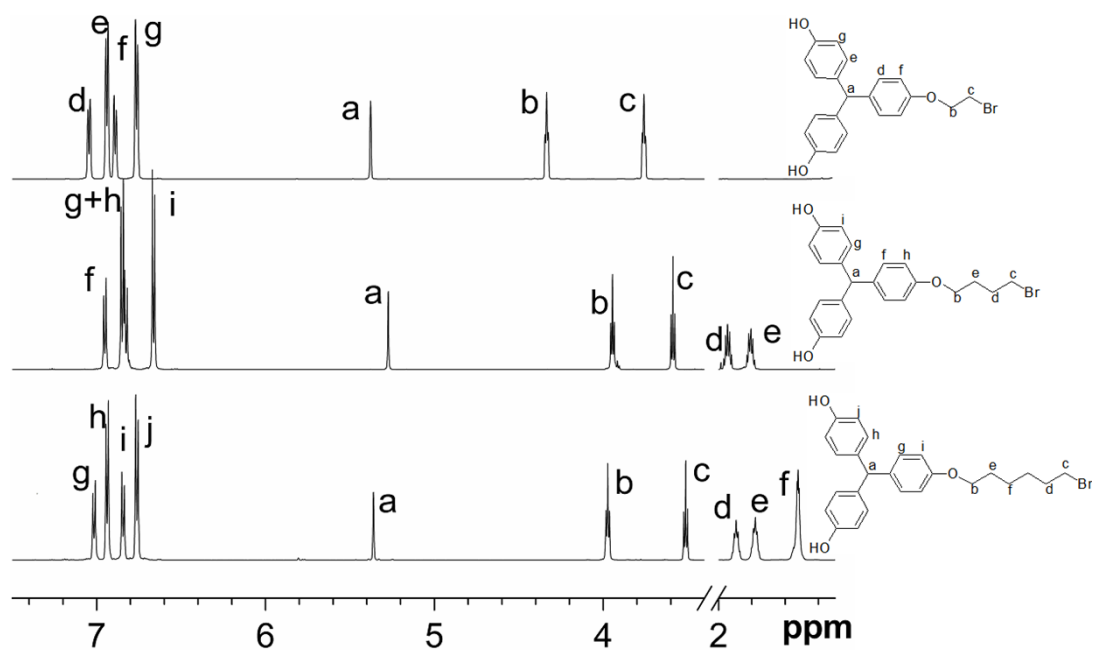

**Fig. S3**  $^1\text{H}$  NMR spectra of three  $\text{AB}_2$  monomers with different spacer length, *i.e.*,  $n = 2, 4,$  and  $6$ .

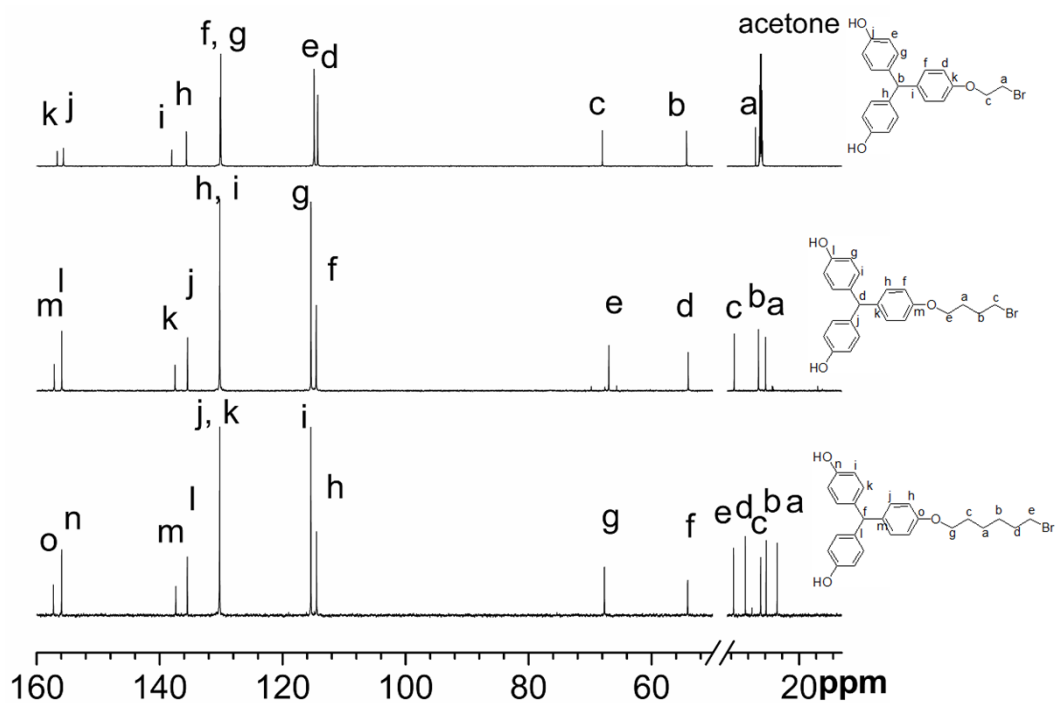

**Fig. S4**  $^{13}\text{C}$  NMR spectra of three  $\text{AB}_2$  monomers with different spacer length, *i.e.*,  $n = 2, 4,$  and  $6$ .

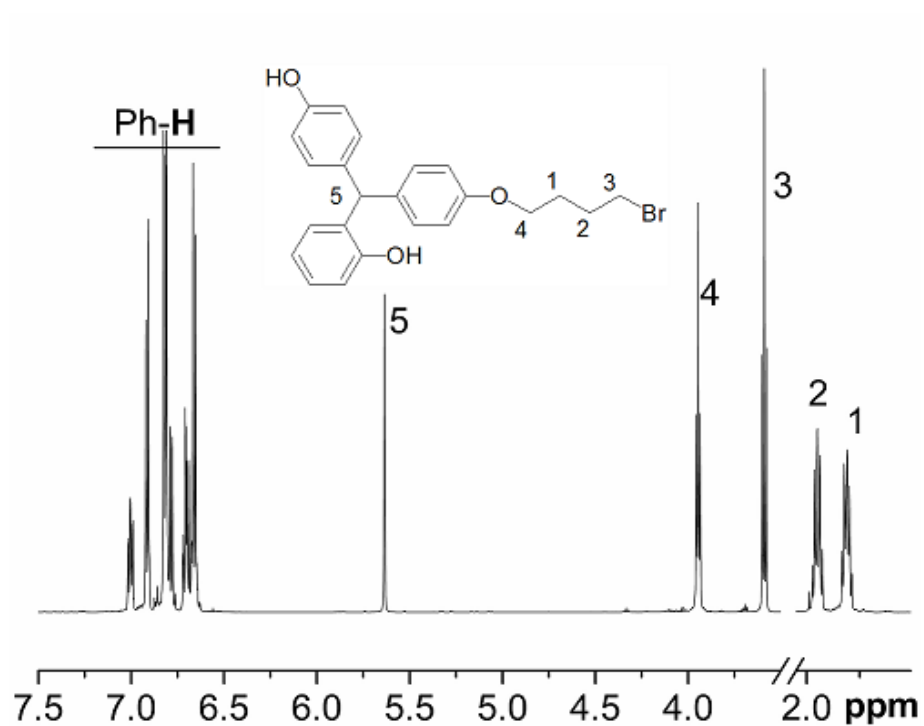

**Fig. S5**  $^1\text{H}$  NMR spectrum of the byproduct ( $n=2$ ) in Scheme 1.

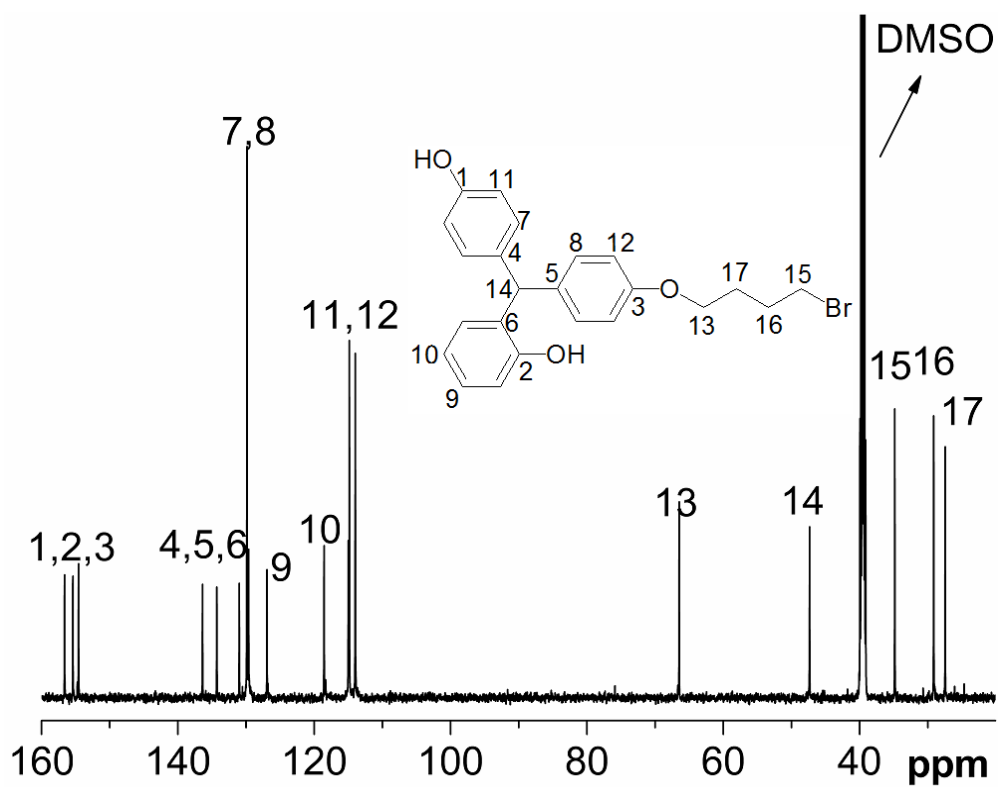

**Fig. S6** The  $^{13}\text{C}$  NMR spectrum of the byproduct ( $n=2$ ) in Scheme 1.

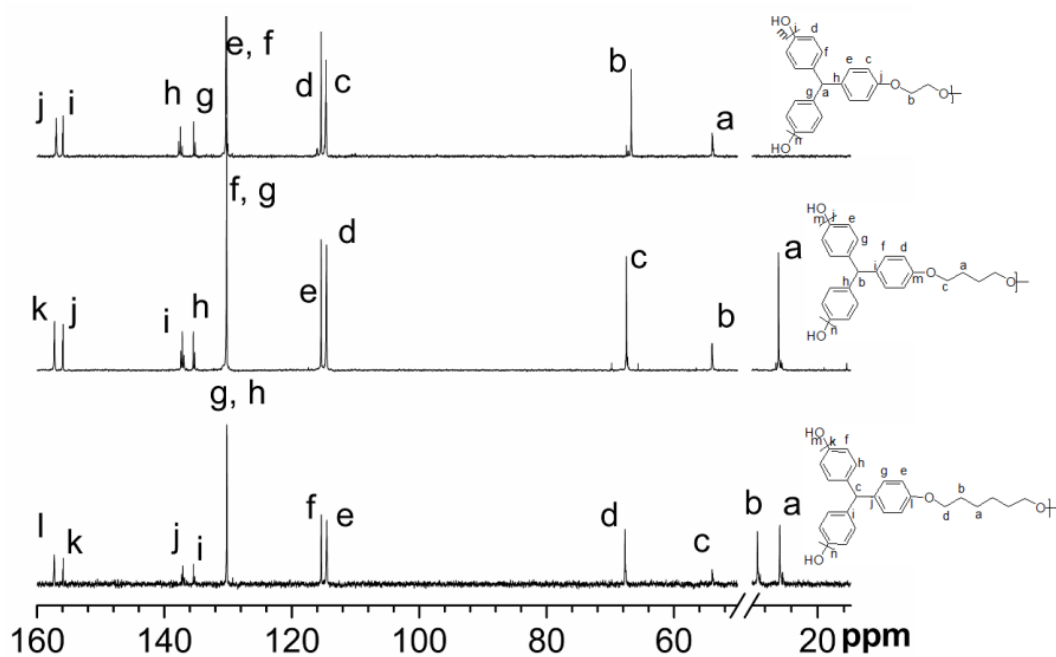

**Fig. S7** The  $^{13}\text{C}$  NMR spectra of HBPEs ( $80^\circ\text{C}$ ,  $0.1\text{ mol/L}$ ) obtained from monomers with different spacer lengths, *i.e.*,  $n=2, 4$  and  $6$ .

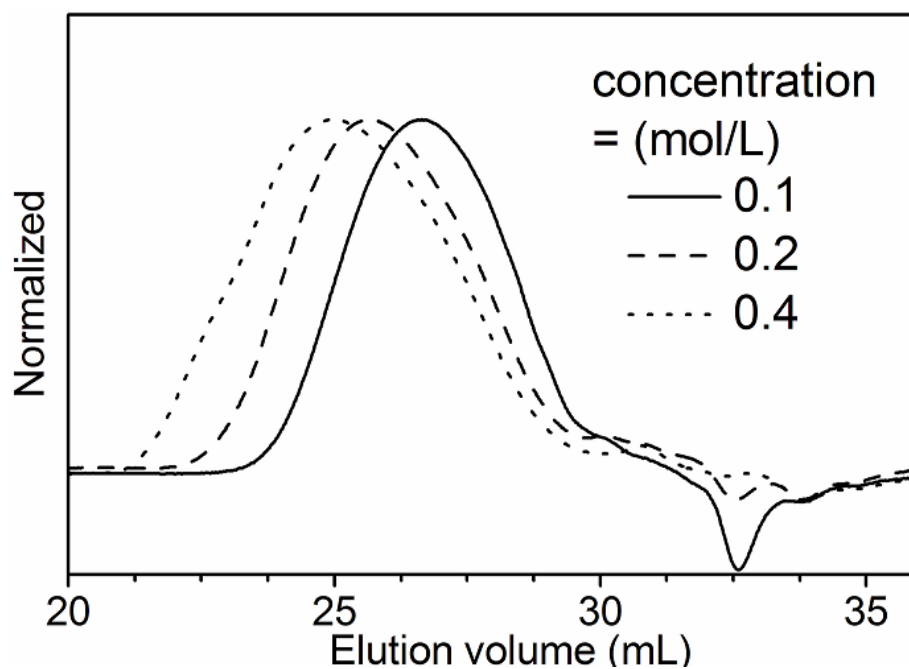

**Fig. S8** The variation of GPC curves with concentration from  $0.1\text{ mol/L}$  to  $0.4\text{ mol/L}$  when polymerized for  $24\text{ h}$ .

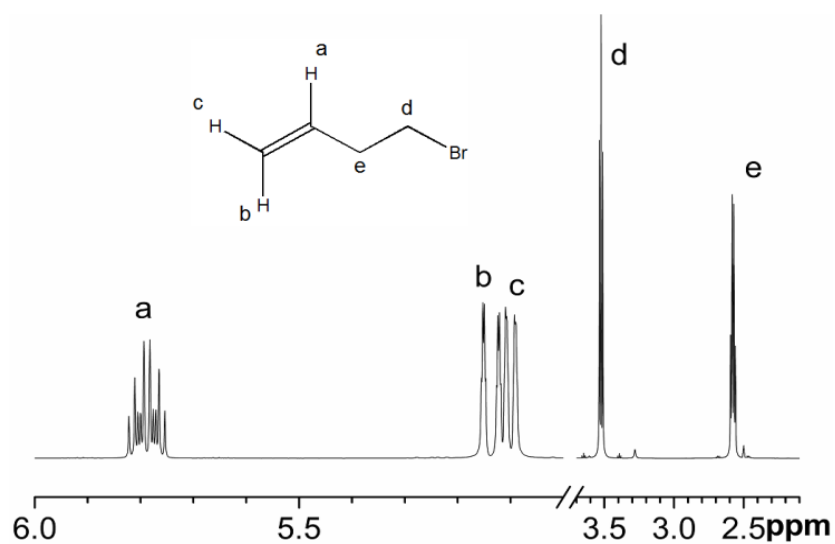

**Fig. S9** The <sup>1</sup>H NMR spectrum of model compound 4-bromo-1-butene.

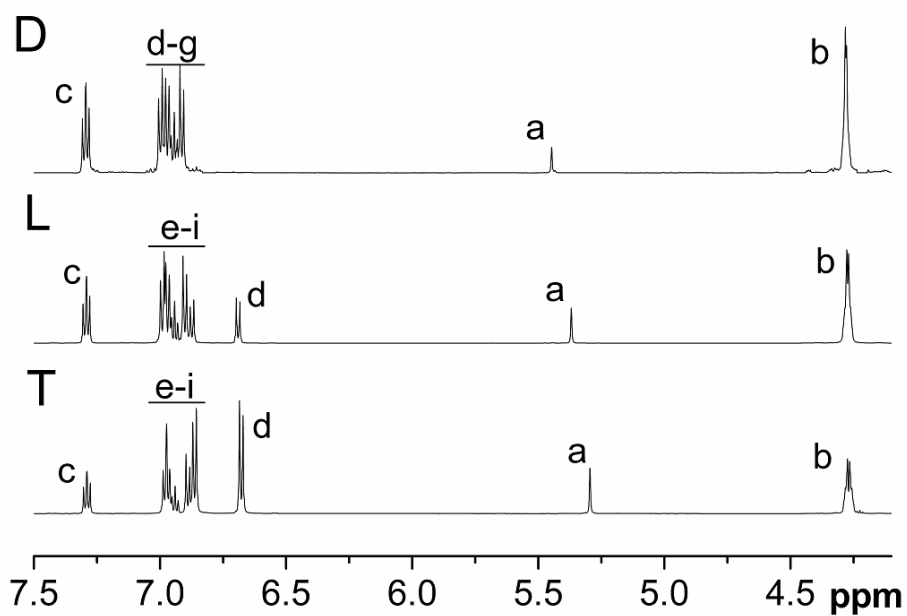

**Fig. S10** The <sup>1</sup>H NMR spectra of three model molecules which are used to determine the degree of branching in HBPEs.

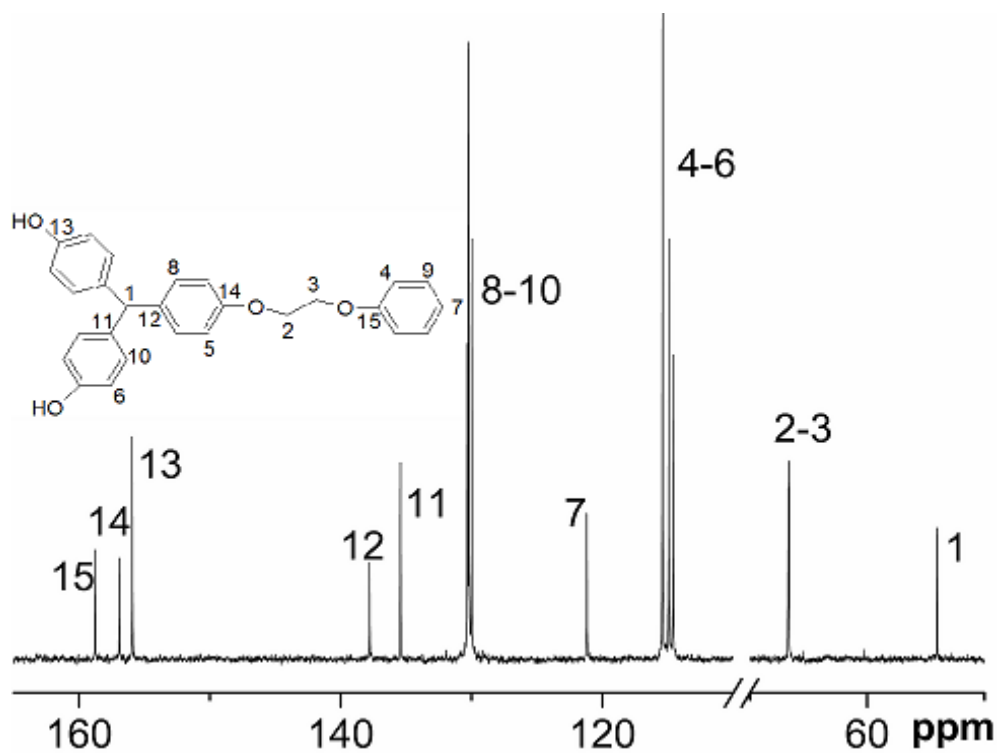

**Fig. S11** The  $^{13}\text{C}$  NMR spectra of the model molecule showing the peak position of the terminal unit (T).

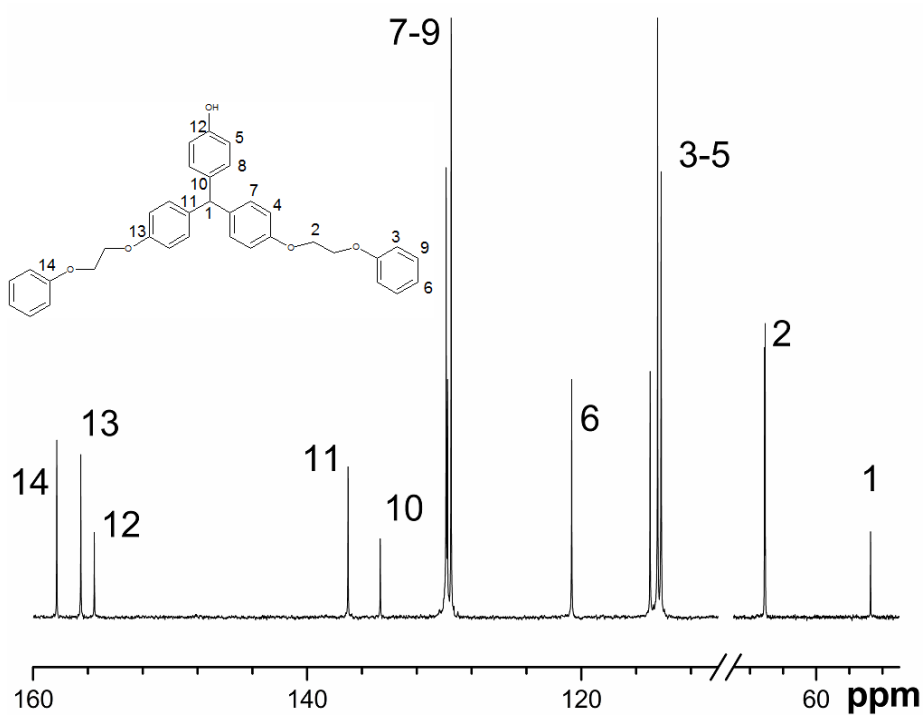

**Fig. S12**  $^{13}\text{C}$  NMR spectra of the model molecule showing the peak position of the

linear unit (L).

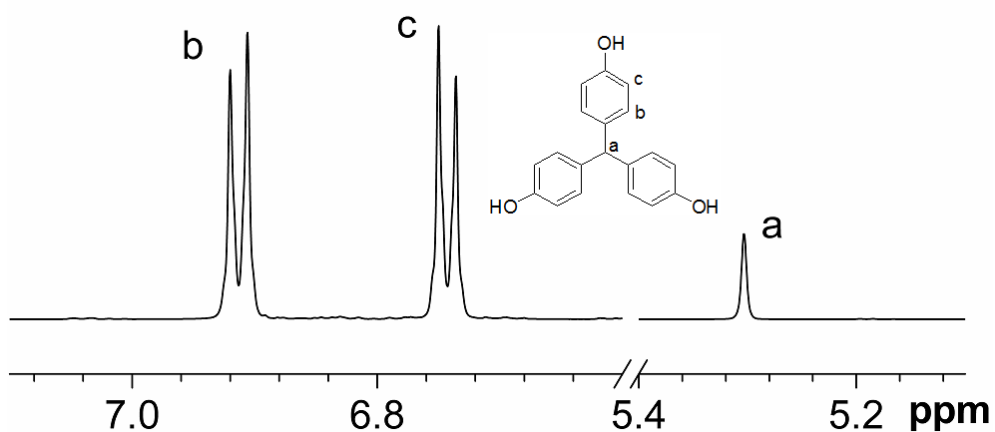

**Fig. S13**  $^1\text{H}$  NMR spectra of the model molecule, triphenol methane.

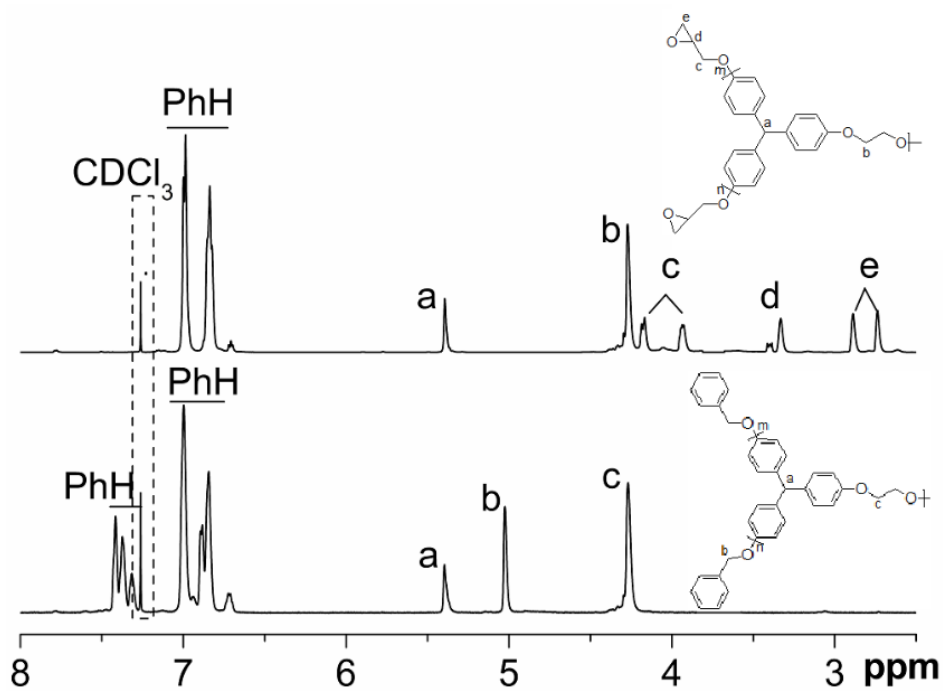

**Fig. S14**  $^1\text{H}$  NMR spectra of epoxide-terminated HBPE-2C-1 (EHBPE-2C-1) and benzyl-terminated HBPE-2C-1 (BHBPE-2C-1).

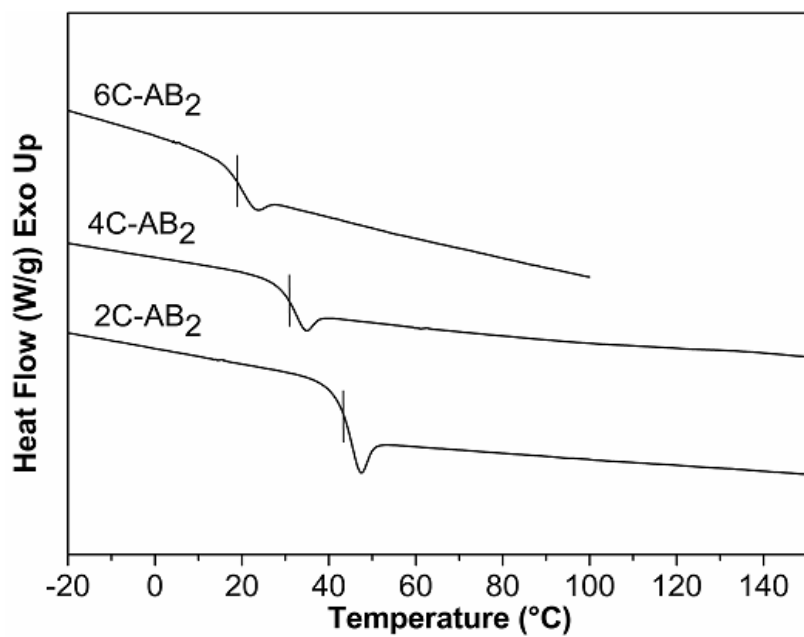

**Fig. S15** DSC traces of three AB<sub>2</sub> monomers (n=2, 4, and 6).

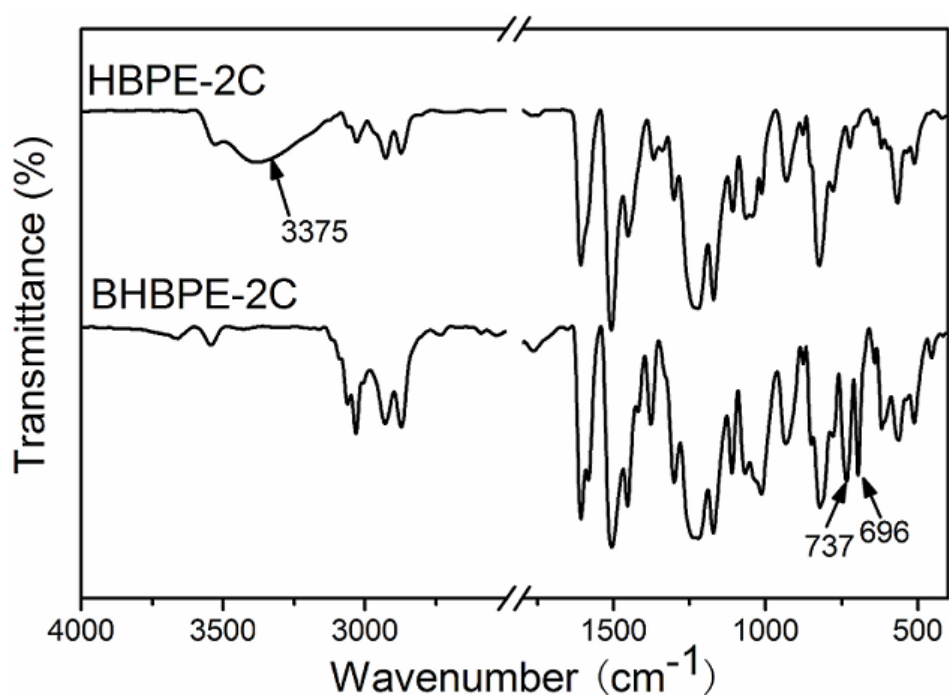

**Fig. S16** FTIR spectra of HBPE-2C and BHBPE-2C-1.

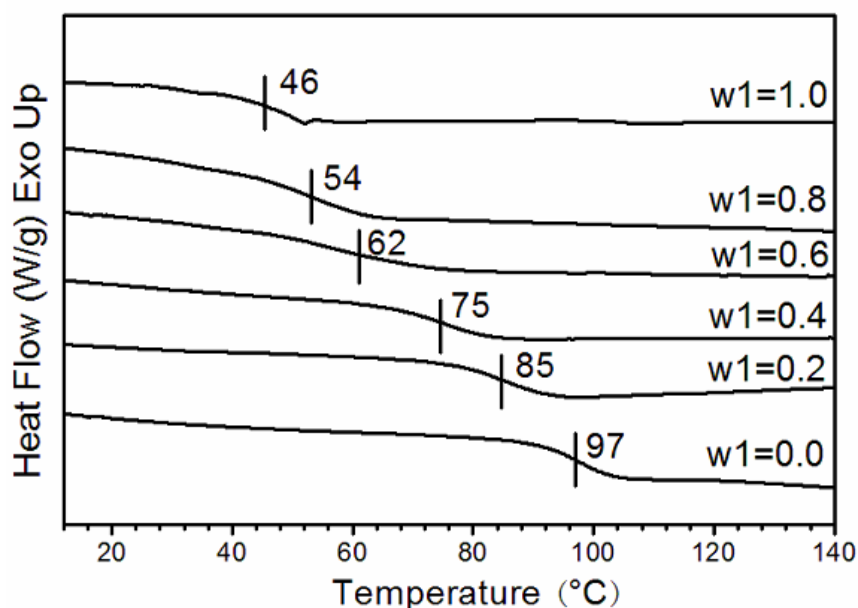

**Fig. 17**  $T_g$ s of binary blends of benzyl-terminated BHBPE-2C-1 and BHBPE-6C-1 as a function of the weight fraction of BHBPE-6C-1.

**HBPE-2C:**  $^1\text{H}$ -NMR (600 MHz, (methyl sulfoxide)- $d_6$ ,  $\delta$ ): 4.22-4.36 (br,  $\text{O}(\text{CH}_2)_2\text{O}$ ), 5.30-5.47 (br,  $\text{CHPh}_3$ ), 6.75-7.10 (br,  $\text{C}_6\text{H}_4\text{O}$ ).  $^{13}\text{C}$ -NMR (600 MHz, (methyl sulfoxide)- $d_6$ ,  $\delta$ ): 53.90, 66.72, 114.65, 115.40, 130.21, 130.34, 135.45, 137.50, 155.95, 156.98.

**HBPE-4C:**  $^1\text{H}$ -NMR (600 MHz, (methyl sulfoxide)- $d_6$ ,  $\delta$ ): 1.84-1.97 (br,  $\text{OCH}_2(\text{CH}_2)_2\text{CH}_2\text{O}$ ), 3.92-4.08 (br,  $\text{OCH}_2(\text{CH}_2)_2\text{CH}_2\text{O}$ ), 5.30-5.44 (br,  $\text{CHPh}_3$ ), 6.72-7.04 (br,  $\text{C}_6\text{H}_4\text{O}$ ).  $^{13}\text{C}$ -NMR (600 MHz, (methyl sulfoxide)- $d_6$ ,  $\delta$ ): 25.95, 54.00, 67.49, 114.56, 115.42, 130.22, 130.25, 135.44, 137.21, 155.89, 157.28.

**HBPE-6C:**  $^1\text{H}$ -NMR (600 MHz, (methyl sulfoxide)- $d_6$ ,  $\delta$ ): 1.40-1.58 (br,  $\text{O}(\text{CH}_2)_2(\text{CH}_2)_2(\text{CH}_2)_2\text{O}$ ), 1.64-1.82 (br,  $\text{OCH}_2\text{CH}_2(\text{CH}_2)_2\text{CH}_2\text{CH}_2\text{O}$ ), 3.80-4.00 (br,  $\text{OCH}_2(\text{CH}_2)_4\text{CH}_2\text{O}$ ), 5.28-5.41 (br,  $\text{CHPh}_3$ ), 6.70-7.08 (br,  $\text{C}_6\text{H}_4\text{O}$ ).  $^{13}\text{C}$ -NMR (600

MHz, (methyl sulfoxide)-d<sub>6</sub>,  $\delta$ ): 25.78, 29.14, 52.95, 67.70, 114.57, 115.36, 130.22, 135.50, 137.10, 155.90, 157.30.

### **Synthesis of 4-(4-bromine-butoxy)benzaldehyde and 4-(6-bromine-hexyloxy) - benzaldehyde**

Both 4-(4-bromine-butoxy)-benzaldehyde and 4-(6-bromine-hexyloxy)-benzaldehyde were synthesized using the same procedure as that of 4-(2-bromine-oxethyl)-benzaldehyde. The obtained product is a brown viscous liquid with a yield of 80%.

4-(4-bromine-butoxy)-benzaldehyde: <sup>1</sup>H-NMR (600 MHz, CDCl<sub>3</sub>,  $\delta$ ): 1.96-2.02 (m, 2H, OCH<sub>2</sub>CH<sub>2</sub>(CH<sub>2</sub>)<sub>2</sub>Br), 2.06-2.12 (m, 2H, O(CH<sub>2</sub>)<sub>2</sub>CH<sub>2</sub>CH<sub>2</sub>Br), 3.50 (t, 2H, O(CH<sub>2</sub>)<sub>3</sub>CH<sub>2</sub>Br), 4.09 (t, 2H, OCH<sub>2</sub>(CH<sub>2</sub>)<sub>3</sub>Br), 6.99 (d, 2H, C<sub>6</sub>H<sub>4</sub>O), 7.83 (d, 2H, C<sub>6</sub>H<sub>4</sub>O), 9.88 (s, 1H, PhCHO). <sup>13</sup>C-NMR (600 MHz, (methyl sulfoxide)-d<sub>6</sub>,  $\delta$ ): 27.73, 29.46, 34.87, 67.62, 115.24, 130.07, 132.16, 163.95, 191.36.

4-(6-bromine-hexyloxy)-benzaldehyde: <sup>1</sup>H-NMR (600 MHz, CDCl<sub>3</sub>,  $\delta$ ): 1.48-1.56 (m, 4H, O(CH<sub>2</sub>)<sub>2</sub>(CH<sub>2</sub>)<sub>2</sub>(CH<sub>2</sub>)<sub>2</sub>Br), 1.81-1.87 (m, 2H, OCH<sub>2</sub>CH<sub>2</sub>(CH<sub>2</sub>)<sub>4</sub>Br), 1.88-1.96 (m, 2H, O(CH<sub>2</sub>)<sub>4</sub>CH<sub>2</sub>CH<sub>2</sub>Br), 3.45 (t, 2H, O(CH<sub>2</sub>)<sub>5</sub>CH<sub>2</sub>Br), 4.05 (t, 2H, OCH<sub>2</sub>(CH<sub>2</sub>)<sub>5</sub>Br), 6.99 (d, 2H, C<sub>6</sub>H<sub>4</sub>O), 7.83 (d, 2H, C<sub>6</sub>H<sub>4</sub>O), 9.88 (s, 1H, PhCHO). <sup>13</sup>C-NMR (600 MHz, CDCl<sub>3</sub>,  $\delta$ ): 25.19, 27.84, 28.86, 32.59, 33.72, 68.12, 114.73, 129.10, 131.97, 164.13, 190.75.

### **Synthesis of 4-(4-bromine-butoxy)-4',4''- dihydroxy triphenylmethane (4C-AB<sub>2</sub>) and 4-(6-bromine-hexyloxy)-4',4''- dihydroxy triphenylmethane (6C-AB<sub>2</sub>)**

Both 4C-AB<sub>2</sub> and 6C-AB<sub>2</sub> were synthesized using the same procedure as 2C-AB<sub>2</sub>, and the obtained product is a pink crystal-like solid with a yield of 40%.

4C-AB<sub>2</sub>: <sup>1</sup>H-NMR (600 MHz, (methyl sulfoxide)-d<sub>6</sub>,  $\delta$ ): 1.78-1.84 (m, 2H, OCH<sub>2</sub>CH<sub>2</sub>(CH<sub>2</sub>)<sub>2</sub>Br), 1.91-1.98 (m, 2H, O(CH<sub>2</sub>)<sub>2</sub>CH<sub>2</sub>CH<sub>2</sub>Br), 3.59 (t, 2H, O(CH<sub>2</sub>)<sub>3</sub>CH<sub>2</sub>Br), 3.94 (t, 2H, OCH<sub>2</sub>(CH<sub>2</sub>)<sub>3</sub>Br), 5.27 (s, 1H, CHPh<sub>3</sub>), 6.66 (d, 4H, C<sub>6</sub>H<sub>4</sub>O), 6.83 (d, 2H, C<sub>6</sub>H<sub>4</sub>O), 6.85 (d, 4H, C<sub>6</sub>H<sub>4</sub>O), 6.95 (d, 2H, C<sub>6</sub>H<sub>4</sub>O), 9.21 (s, 2H, PhOH). <sup>13</sup>C-NMR (600 MHz, (methyl sulfoxide)-d<sub>6</sub>,  $\delta$ ): 27.91, 29.59, 35.29, 54.03, 66.94, 114.53, 115.39, 130.21, 130.26, 135.46, 137.50, 155.91, 157.13.

By product: <sup>1</sup>H-NMR (600 MHz, (methyl sulfoxide)-d<sub>6</sub>,  $\delta$ ): 1.78-1.84 (m, 2H, OCH<sub>2</sub>CH<sub>2</sub>(CH<sub>2</sub>)<sub>2</sub>Br), 1.93-1.98 (m, 2H, O(CH<sub>2</sub>)<sub>2</sub>CH<sub>2</sub>CH<sub>2</sub>Br), 3.59 (t, 2H, O(CH<sub>2</sub>)<sub>3</sub>CH<sub>2</sub>Br), 3.95 (t, 2H, OCH<sub>2</sub>(CH<sub>2</sub>)<sub>3</sub>Br), 5.64 (s, 1H, CHPh<sub>3</sub>), 6.65-7.03 (br, C<sub>6</sub>H<sub>4</sub>O). <sup>13</sup>C-NMR (600 MHz, (methyl sulfoxide)-d<sub>6</sub>,  $\delta$ ): 27.47, 29.15, 34.87, 47.36, 66.47, 113.97, 114.85, 118.56, 126.92, 129.62, 129.87, 131.00, 134.30, 136.38, 154.57, 155.39, 156.62.

6C-AB<sub>2</sub>: <sup>1</sup>H-NMR (600 MHz, acetone-d<sub>6</sub>,  $\delta$ ): 1.48-1.58 (m, 4H, O(CH<sub>2</sub>)<sub>2</sub>(CH<sub>2</sub>)<sub>2</sub>(CH<sub>2</sub>)<sub>2</sub>Br), 1.75-1.82 (m, 2H, OCH<sub>2</sub>CH<sub>2</sub>(CH<sub>2</sub>)<sub>4</sub>Br), 1.87-1.93 (m, 2H, O(CH<sub>2</sub>)<sub>4</sub>CH<sub>2</sub>CH<sub>2</sub>Br), 3.51 (t, 2H, O(CH<sub>2</sub>)<sub>5</sub>CH<sub>2</sub>Br), 4.97 (t, 2H, OCH<sub>2</sub>(CH<sub>2</sub>)<sub>5</sub>Br), 5.36 (s, 1H, CHPh<sub>3</sub>), 6.76 (d, 4H, C<sub>6</sub>H<sub>4</sub>O), 6.85 (d, 2H, C<sub>6</sub>H<sub>4</sub>O), 6.95 (d, 4H, C<sub>6</sub>H<sub>4</sub>O), 7.03 (d, 2H, C<sub>6</sub>H<sub>4</sub>O), 8.14 (s, 2H, PhOH). <sup>13</sup>C-NMR (600 MHz, (methyl sulfoxide)-d<sub>6</sub>,  $\delta$ ):

25.19, 27.79, 29.06, 32.66, 35.44, 54.12, 67.66, 114.48, 115.41, 130.22, 130.25, 135.49, 137.37, 155.94, 157.27.

### **Synthesis of triphenol methane**

PHBA (12.2 g, 0.1 mol), phenol (47 g, 0.5 mol),  $\text{ZnCl}_2$  (1.4 g, 0.01 mol), and PTSA (1.9 g, 0.01 mol) were added into a three-necked flask equipped with mechanical stir and thermometer. After stirring for 1 h, reactants were heated to 45 °C for 24 h. Then the solution was filtered and washed at least twice with both dichloromethane (200 mL) and hot water (>70 °C). The resultant mixtures were dried under vacuum at 90 °C. The obtained pure product is a brick-red solid with a yield of 70%.  $^1\text{H-NMR}$  (600 MHz, acetone- $\text{d}_6$ ,  $\delta$ ): 5.33 (s, 1H,  $\text{Ph}_3\text{CH}$ ), 6.76 (d, 6H,  $\text{C}_6\text{H}_4\text{O}$ ), 6.94 (d, 6H,  $\text{C}_6\text{H}_4\text{O}$ ), 8.15 (s, 3H,  $\text{PhOH}$ );  $^{13}\text{C-NMR}$  (600 MHz, acetone,  $\delta$ ): 54.32, 114.75, 130.06, 136.04, 155.50.

### **Synthesis of a model compound for the terminal unit (T)**

2C-AB<sub>2</sub> (4 g, 0.01 mol), phenol (3.76, 0.04 mol),  $\text{K}_2\text{CO}_3$  (8.29 g, 0.06 mol), and 100 mL DMF were added into a three-necked flask equipped under mechanical stirring. Reactants were heated to 80 °C for 24 h and then cooled to room temperature. The mixture was acidified with hydrochloric acid and then filtered. After removing most of DMF by a rotary evaporator, the remanent solution was pure into water. The precipitate was collected and dried under vacuum. The crude prduct was purified by silica gel column chromatography with 1:1 ethyl acetate/petroleum ether as the eluent,

and the obtained the product was a brick red solid with a yield of 90%.  $^1\text{H}$ -NMR (600 MHz, (methyl sulfoxide)- $\text{d}_6$ ,  $\delta$ ): 4.30-4.24 (br, 4H,  $\text{O}(\text{CH}_2)_2\text{O}$ ), 5.29 (s, 1H,  $\text{Ph}_3\text{CH}$ ), 6.68 (d, 4H,  $\text{C}_6\text{H}_4\text{O}$ ), 6.84-7.00 (m, 11H,  $\text{C}_6\text{H}_4\text{O}$ ), 7.29 (t, 2H,  $\text{C}_6\text{H}_4\text{O}$ ).  $^{13}\text{C}$ -NMR (600 MHz, (methyl sulfoxide)- $\text{d}_6$ ,  $\delta$ ): 54.02, 66.65, 66.73, 114.60, 114.93, 115.40, 121.19, 129.99, 130.23, 130.33, 135.43, 137.79, 155.93, 156.93, 158.77.

### **Synthesis of model compounds with well dedinfed linear (L) and the dendric (D) units**

Both compounds were sysnthesized using the same method. THTPM (5.84 g, 0.02 mol), 2-Phenoxyethylbromide (20.1 g, 0.1 mol),  $\text{K}_2\text{CO}_3$  (8.3 g, 0.06 mol), and 100 mL DMF was added into a three-necked flask under mechanical stirring. The reactants were heated to 80 °C for 24 h and then cooled to room temperature. The mixture was acidified with hydrochloric acid and then filtered. Most of DMF was removed by a rotary evaporator. The crude product was purified by silica gel column chromatography with 1:20 ethyl acetate/petroleum ether as the eluent. The obtained product is a white crystal-like solid. The compounds with well defined linear and dendric units have yields of 40% (L) and 25% (D), respectively.

**Linear unit (L):**  $^1\text{H}$ -NMR (600 MHz, (methyl sulfoxide)- $\text{d}_6$ ,  $\delta$ ): 4.25-4.30 (br, 4H,  $\text{O}(\text{CH}_2)_2\text{O}$ ), 5.37 (s, 1H,  $\text{Ph}_3\text{CH}$ ), 6.69 (d, 2H,  $\text{C}_6\text{H}_4\text{O}$ ), 6.86-7.00 (m, 16H,  $\text{C}_6\text{H}_4\text{O}$ ), 7.29 (t, 4H,  $\text{C}_6\text{H}_4\text{O}$ ).  $^{13}\text{C}$ -NMR (600 MHz, (methyl sulfoxide)- $\text{d}_6$ ,  $\delta$ ): 53.45, 66.20,

114.18, 114.43, 114.96, 120.70, 129.49, 129.77, 129.86, 134.67, 137.02, 155.54, 156.53, 158.29.

**Dendric unit (D):**  $^1\text{H}$ -NMR (600 MHz, (methyl sulfoxide)- $\text{d}_6$ ,  $\delta$ ): 4.30-4.26 (br, 4*H*,  $\text{O}(\text{CH}_2)_2\text{O}$ ), 5.45 (s, 1*H*,  $\text{Ph}_3\text{CH}$ ), 6.89-7.10 (m, 21*H*,  $\text{C}_6\text{H}_4\text{O}$ ), 7.29 (t, 6*H*,  $\text{C}_6\text{H}_4\text{O}$ ).
